# Supplementary material for: Expression of SREBP-1c Requires SREBP-2-mediated Generation of a Sterol Ligand for LXR in Livers of Mice
Source: eLife journal article supplement (doi:10.7554/elife.25015), 2017-02-28
Supplement: supp [file elife-25015-supp-v2.zip]

## Figure 4-figure Supplement 1

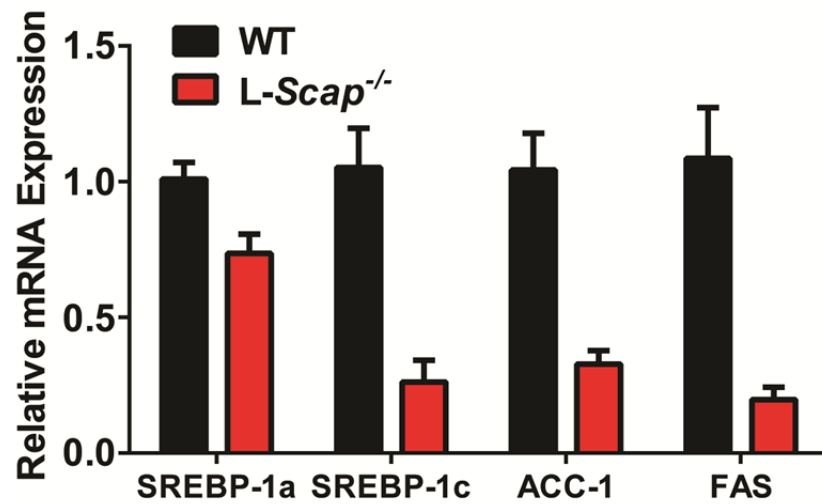

Liver mRNAs levels of WT and L-Scap<sup>-/-</sup> mice fed chow diet supplemented with an LXR agonist. Six male mice (14 weeks of age) of each genotype were fed chow supplemented with 25 mg/kg of the LXR agonist T901317 for 12 days. Total RNA from livers of each mouse was subjected to real-time RT-PCR as described in “Materials and Methods.” Apo B was used as the invariant control mRNA. Values represent the amount of mRNA relative to those in the WT mice, which are arbitrarily assigned a value of 1.
